# Supplementary material
Source: publisher site journal article supplement (https://www.dovepress.com/get_supplementary_file.php?f=386941.xlsx)
Supplement: Supplementary file 1 [file get_supplementary_file.php]

## Sheet: Table S1+S2
Table S1. GO annotations
Category	Term	Enrichment Score	P_Value	Count	Genes	Fold Enrichment	Bonferroni	Benjamini	FDR
GOTERM_BP_DIRECT	GO:0045429~positive regulation of nitric oxide biosynthetic process	4.94661	6.42476e-13	9	IL6, HSP90AA1, IFNG, INSR, AKT1, PTGS2, ESR1, EGFR, ICAM1	66.3133	7.82548e-10	1.95634e-10	1.77002e-10
GOTERM_BP_DIRECT	GO:0007265~Ras protein signal transduction	4.49526	7.3814e-08	7	RB1, CCNA2, CDKN1A, JUN, CDK2, MAPK14, TP53	31.683	8.99014e-05	8.99055e-06	8.1343e-06
GOTERM_BP_DIRECT	GO:0071222~cellular response to lipopolysaccharide	3.42056	1.28555e-06	7	IL10, IL6, IFNG, NOS2, MAPK14, RELA, ICAM1	19.6266	0.00156458	0.000100793	9.11934e-05
GOTERM_BP_DIRECT	GO:0001934~positive regulation of protein phosphorylation	2.98964	2.54506e-06	7	CCND1, INSR, ERBB2, AKT1, F2, MMP9, EGFR	17.4631	0.00309509	0.000163152	0.000147613
GOTERM_BP_DIRECT	GO:0045740~positive regulation of DNA replication	3.7676	8.38827e-06	5	IL6, JUN, PCNA, INSR, EGFR	37.7179	0.0101649	0.00048652	0.000440185
GOTERM_BP_DIRECT	GO:0035729~cellular response to hepatocyte growth factor stimulus	3.47134	9.95295e-06	4	IL10, GSK3B, IL6, RELA	90.5229	0.0120496	0.000551032	0.000498552
GOTERM_BP_DIRECT	GO:0007568~aging	3.47134	1.15103e-05	7	IL10, CASP9, IL6, CASP7, JUN, AKT1, RELA	13.4413	0.0139219	0.000609548	0.000551496
GOTERM_BP_DIRECT	GO:0042832~defense response to protozoan	3.31454	2.62073e-05	4	IL10, IL4, IL6, IFNG	66.7011	0.0314168	0.00109845	0.000993838
GOTERM_BP_DIRECT	GO:0048661~positive regulation of smooth muscle cell proliferation	4.94661	3.50719e-05	5	IL6, JUN, AKT1, PTGS2, EGFR	26.4025	0.0418187	0.00133492	0.00120779
GOTERM_BP_DIRECT	GO:0048661~positive regulation of smooth muscle cell proliferation	3.7676	3.50719e-05	5	IL6, JUN, AKT1, PTGS2, EGFR	26.4025	0.0418187	0.00133492	0.00120779
GOTERM_BP_DIRECT	GO:0051092~positive regulation of NF-kappaB transcription factor activity	3.42056	5.57277e-05	6	NFKBIA, AR, IL6, CD40LG, RELA, ICAM1	14.2931	0.0656257	0.00178622	0.0016161
GOTERM_BP_DIRECT	GO:2000379~positive regulation of reactive oxygen species metabolic process	4.49526	0.000107196	4	CDKN1A, F2, MAPK14, TP53	42.244	0.122406	0.00296737	0.00268477
GOTERM_BP_DIRECT	GO:0043200~response to amino acid	3.42056	0.000118422	4	IL6, CASP3, RELA, ICAM1	40.8813	0.134326	0.00320529	0.00290002
GOTERM_BP_DIRECT	GO:0008283~cell proliferation	2.98964	0.000126912	8	AR, PCNA, ERBB2, AKT1, TP53, MET, EGFR, BCL2L1	6.92525	0.143232	0.00326565	0.00295464
GOTERM_BP_DIRECT	GO:0045907~positive regulation of vasoconstriction	4.94661	0.000130387	4	AKT1, PTGS2, EGFR, ICAM1	39.6038	0.146852	0.00326565	0.00295464
GOTERM_BP_DIRECT	GO:0030307~positive regulation of cell growth	2.98964	0.000131377	5	ERBB2, AKT1, F2, EGFR, IL2	18.8589	0.14788	0.00326565	0.00295464
GOTERM_BP_DIRECT	GO:0006508~proteolysis	2.96458	0.000138857	9	CASP9, CASP7, MMP13, PLAU, MMP1, CASP3, MMP2, F2, MMP9	5.70294	0.155609	0.00338255	0.00306041
GOTERM_BP_DIRECT	GO:0010507~negative regulation of autophagy	2.92394	0.000186062	4	AKT1, MET, BCL2L1, MCL1	35.2034	0.202796	0.00435813	0.00394307
GOTERM_BP_DIRECT	GO:0038128~ERBB2 signaling pathway	2.98964	0.000218876	4	HSP90AA1, ERBB2, AKT1, EGFR	33.3505	0.234036	0.00484711	0.00438548
GOTERM_BP_DIRECT	GO:0045348~positive regulation of MHC class II biosynthetic process	3.31454	0.000260242	3	IL10, IL4, IFNG	118.811	0.271681	0.00551639	0.00499102
GOTERM_BP_DIRECT	GO:0042102~positive regulation of T cell proliferation	3.31454	0.000846254	4	IL4, IL6, CD40LG, IFNG	21.122	0.643412	0.0130473	0.0118047
GOTERM_BP_DIRECT	GO:0030574~collagen catabolic process	2.96458	0.0010214	4	MMP13, MMP1, MMP2, MMP9	19.8019	0.711974	0.0153589	0.0138961
GOTERM_BP_DIRECT	GO:0018108~peptidyl-tyrosine phosphorylation	2.98964	0.00127713	5	HSP90AA1, INSR, ERBB2, MET, EGFR	10.3539	0.789134	0.0180877	0.016365
GOTERM_BP_DIRECT	GO:0071260~cellular response to mechanical stimulus	4.94661	0.00137998	4	CHEK1, AKT1, PTGS2, EGFR	17.8496	0.813994	0.0193197	0.0174797
GOTERM_BP_DIRECT	GO:0008637~apoptotic mitochondrial changes	2.92394	0.00155504	3	AKT1, BCL2L1, MCL1	50.0258	0.849759	0.0208137	0.0188314
GOTERM_BP_DIRECT	GO:0022617~extracellular matrix disassembly	2.96458	0.00167899	4	MMP13, MMP1, MMP2, MMP9	16.6753	0.870844	0.0219894	0.0198952
GOTERM_BP_DIRECT	GO:0014066~regulation of phosphatidylinositol 3-kinase signaling	2.98964	0.00180906	4	ERBB2, MAPK1, AKT1, EGFR	16.2477	0.889797	0.023194	0.0209851
GOTERM_BP_DIRECT	GO:0046777~protein autophosphorylation	2.98964	0.00196222	5	GSK3B, INSR, ERBB2, AKT1, EGFR	9.21018	0.908584	0.024639	0.0222925
GOTERM_BP_DIRECT	GO:0007169~transmembrane receptor protein tyrosine kinase signaling pathway	2.98964	0.00326733	4	INSR, ERBB2, MET, EGFR	13.2013	0.981428	0.0382655	0.0346212
GOTERM_BP_DIRECT	GO:0042593~glucose homeostasis	1.38631	0.00376978	4	IL6, INSR, AKT1, PPARG	12.5477	0.989951	0.0421247	0.0381128
GOTERM_BP_DIRECT	GO:0071479~cellular response to ionizing radiation	4.49526	0.00412943	3	CDKN1A, MAPK14, TP53	30.661	0.993527	0.0453122	0.0409967
GOTERM_BP_DIRECT	GO:0071364~cellular response to epidermal growth factor stimulus	2.98964	0.00467042	3	ERBB2, AKT1, EGFR	28.8027	0.99666	0.0490394	0.044369
GOTERM_BP_DIRECT	GO:0044267~cellular protein metabolic process	2.96458	0.00581949	4	MMP13, MMP1, MMP2, F2	10.74	0.999182	0.0598229	0.0541255
GOTERM_BP_DIRECT	GO:2001240~negative regulation of extrinsic apoptotic signaling pathway in absence of ligand	2.92394	0.00584477	3	AKT1, BCL2L1, MCL1	25.6889	0.999207	0.0598229	0.0541255
GOTERM_BP_DIRECT	GO:0006954~inflammatory response	3.47134	0.00621382	6	IL10, IL6, CD40LG, AKT1, PTGS2, RELA	5.01578	0.999496	0.062549	0.0565919
GOTERM_BP_DIRECT	GO:0006955~immune response	3.31454	0.00956185	6	IL10, IL4, IL6, CD40LG, IFNG, IL2	4.51539	0.999992	0.0869129	0.0786355
GOTERM_BP_DIRECT	GO:0070374~positive regulation of ERK1 and ERK2 cascade	3.7676	0.0169266	4	IL6, JUN, EGFR, ICAM1	7.24183	1	0.133874	0.121124
GOTERM_BP_DIRECT	GO:0032868~response to insulin	3.47134	0.0182918	3	IL10, IL6, RELA	14.1864	1	0.139501	0.126215
GOTERM_BP_DIRECT	GO:0071347~cellular response to interleukin-1	3.42056	0.0203981	3	IL6, RELA, ICAM1	13.3872	1	0.148772	0.134603
GOTERM_BP_DIRECT	GO:0032869~cellular response to insulin stimulus	1.38631	0.0237376	3	INSR, AKT1, PPARG	12.344	1	0.167728	0.151753
GOTERM_BP_DIRECT	GO:0048015~phosphatidylinositol-mediated signaling	2.98964	0.0426646	3	ERBB2, AKT1, EGFR	8.96689	1	0.235138	0.212744
GOTERM_BP_DIRECT	GO:0006979~response to oxidative stress	4.94661	0.0456055	3	AKT1, PTGS2, EGFR	8.64082	1	0.244702	0.221397
GOTERM_BP_DIRECT	GO:0071356~cellular response to tumor necrosis factor	3.42056	0.0456055	3	IL6, RELA, ICAM1	8.64082	1	0.244702	0.221397
GOTERM_BP_DIRECT	GO:0000165~MAPK cascade	2.98964	0.0474257	4	ERBB2, MAPK1, EGFR, IL2	4.8371	1	0.253353	0.229224
GOTERM_CC_DIRECT	GO:0005654~nucleoplasm	7.10222	1.22434e-10	29	RB1, TOP2A, CDKN1A, PCNA, XIAP, NR3C1, RELA, CASP7, CCNB1, RXRA, CCND1, CASP3, CHEK1, AKT1, MAPK1, MCL1, NCOA1, JUN, HSP90AA1, MAPK14, ESR1, CCNA2, AR, CDK4, CDK2, MDM2, BIRC5, PPARG, TP53	3.58176	1.84876e-08	1.84876e-08	1.61613e-08
GOTERM_CC_DIRECT	GO:0005634~nucleus	7.10222	4.50924e-09	37	RB1, TOP2A, GSK3B, CDKN1A, PCNA, XIAP, NR3C1, PTGS2, RELA, EGFR, CASP9, CASP7, CCNB1, RXRA, CCND1, CASP3, ERBB2, CHEK1, AKT1, MAPK1, MCL1, NCOA1, JUN, HSP90AA1, NOS2, MMP2, MAPK14, ESR1, NFKBIA, CCNA2, AR, CDK4, CDK2, MDM2, BIRC5, PPARG, TP53	2.34948	6.80894e-07	3.40447e-07	2.9761e-07
GOTERM_CC_DIRECT	GO:0005829~cytosol	7.10222	8.19194e-07	26	GSK3B, CDKN1A, XIAP, RELA, CASP9, CASP7, CCNB1, CCND1, CASP3, CHEK1, AKT1, MAPK1, MCL1, JUN, HSP90AA1, NOS2, MAPK14, NFKBIA, AR, CDK4, CDK2, MDM2, BIRC5, PPARG, TP53, BCL2L1	2.69686	0.000123691	4.12327e-05	3.60445e-05
GOTERM_CC_DIRECT	GO:0043234~protein complex	7.10222	2.19976e-06	10	TOP2A, AR, CDKN1A, HSP90AA1, MDM2, MAPK1, AKT1, NR3C1, PTGS2, TP53	8.34585	0.000332109	8.3041e-05	7.25921e-05
GOTERM_CC_DIRECT	GO:0005737~cytoplasm	7.10222	3.09851e-06	32	TOP2A, GSK3B, PCNA, XIAP, NR3C1, PTGS2, RELA, EGFR, CASP7, CCNB1, CCND1, CASP3, ERBB2, AKT1, MAPK1, MCL1, IL10, NCOA1, HSP90AA1, NOS2, MAPK14, ESR1, NFKBIA, CCNA2, AR, IL6, IFNG, CDK2, MDM2, BIRC5, TP53, BCL2L1	2.10708	0.000467766	9.35749e-05	8.18006e-05
GOTERM_CC_DIRECT	GO:0005615~extracellular space	2.4155	7.7323e-05	14	IL10, MMP2, F2, MMP9, EGFR, IL2, ICAM1, IL4, IL6, MMP13, CD40LG, IFNG, PLAU, CHEK1	3.57378	0.0116083	0.00166797	0.00145809
GOTERM_CC_DIRECT	GO:0005576~extracellular region	1.77119	7.7323e-05	14	IL10, MMP2, F2, MMP9, EGFR, IL2, ICAM1, IL4, IL6, MMP13, CD40LG, IFNG, PLAU, CHEK1	3.57378	0.0116083	0.00166797	0.00145809
GOTERM_CC_DIRECT	GO:0009897~external side of plasma membrane	1.26363	0.000347877	9	GSK3B, CDKN1A, HSP90AA1, NOS2, CDK4, ERBB2, PPARG, EGFR, PTGES	4.98332	0.0511823	0.00583661	0.0051022
GOTERM_CC_DIRECT	GO:0005578~proteinaceous extracellular matrix	2.4155	0.00159189	13	IL10, HSP90AA1, MMP1, MMP2, F2, MMP9, IL2, IL4, IL6, MMP13, IFNG, PLAU, MET	2.77642	0.213818	0.0218523	0.0191027
GOTERM_CC_DIRECT	GO:0031012~extracellular matrix	2.4155	0.00316763	5	IL4, IL6, CD40LG, IFNG, ICAM1	8.07157	0.380642	0.0398594	0.034844
GOTERM_CC_DIRECT	GO:0005615~extracellular space	1.26363	0.00569539	4	RXRA, INSR, ERBB2, EGFR	10.8299	0.577879	0.0537822	0.0470149
GOTERM_CC_DIRECT	GO:0009986~cell surface	1.77119	0.0188282	6	HSP90AA1, CD40LG, PLAU, MET, EGFR, ICAM1	3.80645	0.943311	0.123611	0.108058
GOTERM_CC_DIRECT	GO:0005925~focal adhesion	1.26363	0.0188282	6	HSP90AA1, CD40LG, PLAU, MET, EGFR, ICAM1	3.80645	0.943311	0.123611	0.108058
GOTERM_CC_DIRECT	GO:0070062~extracellular exosome	2.4155	0.0409949	4	MMP13, MMP1, MMP2, MMP9	5.13208	0.998201	0.229268	0.20042
GOTERM_CC_DIRECT	GO:0048471~perinuclear region of cytoplasm	1.26363	0.0434687	12	HSP90AA1, CCNB1, CD40LG, CCND1, INSR, ERBB2, ESR1, EGFR, PTGES, BCL2L1, ICAM1, MCL1	1.87554	0.998782	0.234421	0.204924
GOTERM_MF_DIRECT	GO:0019903~protein phosphatase binding	4.40088	3.76986e-08	7	HSP90AA1, ERBB2, PPARG, MAPK14, TP53, MET, EGFR	35.3899	9.16071e-06	2.29019e-06	1.9132e-06
GOTERM_MF_DIRECT	GO:0008134~transcription factor binding	3.32624	1.85763e-07	10	RB1, NFKBIA, AR, JUN, CCND1, MAPK1, PPARG, ESR1, TP53, RELA	11.2151	4.51394e-05	9.02808e-06	7.54197e-06
GOTERM_MF_DIRECT	GO:0004672~protein kinase activity	4.06936	1.32183e-06	10	GSK3B, CCND1, CDK4, ERBB2, CHEK1, CDK2, AKT1, MAPK14, MET, EGFR	8.87213	0.000321154	5.30139e-05	4.42874e-05
GOTERM_MF_DIRECT	GO:0003682~chromatin binding	3.32624	2.66862e-06	10	TOP2A, NCOA1, AR, JUN, PCNA, PPARG, ESR1, TP53, RELA, EGFR	8.14602	0.000648265	8.10593e-05	6.77162e-05
GOTERM_MF_DIRECT	GO:0003707~steroid hormone receptor activity	3.32624	2.61174e-05	5	AR, RXRA, PPARG, NR3C1, ESR1	28.4383	0.00632651	0.00046043	0.000384639
GOTERM_MF_DIRECT	GO:0004879~RNA polymerase II transcription factor activity, ligand-activated sequence-specific DNA binding	3.32624	0.000183204	4	AR, RXRA, PPARG, ESR1	35.3899	0.043546	0.00278241	0.0023244
GOTERM_MF_DIRECT	GO:0004714~transmembrane receptor protein tyrosine kinase activity	4.40088	0.000215519	4	INSR, ERBB2, MET, EGFR	33.5273	0.0510287	0.00290951	0.00243058
GOTERM_MF_DIRECT	GO:0004716~receptor signaling protein tyrosine kinase activity	4.40088	0.000412242	3	INSR, ERBB2, EGFR	95.5528	0.0953394	0.00527236	0.00440448
GOTERM_MF_DIRECT	GO:0005524~ATP binding	4.06936	0.000465724	14	TOP2A, GSK3B, HSP90AA1, INSR, MAPK14, EGFR, CDK4, ERBB2, CHEK1, CDK2, AKT1, MAPK1, MET, TP53	2.9827	0.107025	0.00565854	0.00472709
GOTERM_MF_DIRECT	GO:0044212~transcription regulatory region DNA binding	3.32624	0.000489716	6	AR, JUN, RXRA, PPARG, TP53, RELA	8.9721	0.112219	0.00566672	0.00473392
GOTERM_MF_DIRECT	GO:0004713~protein tyrosine kinase activity	4.40088	0.000743894	5	HSP90AA1, INSR, ERBB2, MET, EGFR	11.974	0.165426	0.0078594	0.00656567
GOTERM_MF_DIRECT	GO:0004674~protein serine/threonine kinase activity	4.06936	0.00100606	7	GSK3B, CDK4, CHEK1, CDK2, MAPK1, AKT1, MAPK14	5.9297	0.216979	0.0101864	0.00850961
GOTERM_MF_DIRECT	GO:0005496~steroid binding	3.32624	0.00310957	3	AR, NR3C1, ESR1	35.3899	0.530836	0.026056	0.021767
GOTERM_MF_DIRECT	GO:0043565~sequence-specific DNA binding	3.32624	0.00499198	7	AR, JUN, RXRA, PPARG, NR3C1, ESR1, TP53	4.30418	0.703613	0.0363469	0.0303639
GOTERM_MF_DIRECT	GO:0001077~transcriptional activator activity, RNA polymerase II core promoter proximal region sequence-specific binding	3.32624	0.00596322	5	AR, JUN, NR3C1, ESR1, RELA	6.74808	0.766226	0.0402517	0.0336259
GOTERM_MF_DIRECT	GO:0003700~transcription factor activity, sequence-specific DNA binding	3.32624	0.00866916	9	RB1, AR, JUN, RXRA, PPARG, NR3C1, ESR1, TP53, RELA	2.98292	0.879462	0.055437	0.0463116
GOTERM_MF_DIRECT	GO:0003677~DNA binding	3.32624	0.0117276	12	TOP2A, RB1, AR, JUN, RXRA, PCNA, MAPK1, PPARG, NR3C1, ESR1, TP53, RELA	2.28322	0.943111	0.0693161	0.0579061
GOTERM_MF_DIRECT	GO:0000978~RNA polymerase II core promoter proximal region sequence-specific DNA binding	3.32624	0.0235869	5	AR, JUN, NR3C1, ESR1, RELA	4.48605	0.996973	0.1246	0.10409
Table S2. KEGG signals enrichment.
Category	Term	Enrichment Score	P_Value	Count	Genes	Fold Enrichment	Bonferroni	Benjamini	FDR
KEGG_PATHWAY	hsa05215:Prostate cancer	10.3495	1.783e-17	16	RB1, GSK3B, CDKN1A, HSP90AA1, EGFR, RELA, CASP9, NFKBIA, AR, CCND1, ERBB2, CDK2, MDM2, AKT1, MAPK1, TP53	24.5241	2.8528e-15	1.4264e-15	6.7754e-16
KEGG_PATHWAY	hsa05219:Bladder cancer	10.3495	2.45158e-15	12	RB1, CDKN1A, CCND1, MMP1, CDK4, MMP2, ERBB2, MDM2, MAPK1, TP53, MMP9, EGFR	39.4778	3.90799e-13	9.80632e-14	4.658e-14
KEGG_PATHWAY	hsa05222:Small cell lung cancer	10.3495	1.49025e-14	14	RB1, NOS2, XIAP, PTGS2, RELA, CASP9, NFKBIA, RXRA, CCND1, CDK4, CDK2, AKT1, TP53, BCL2L1	22.2159	2.38032e-12	4.76879e-13	2.26517e-13
KEGG_PATHWAY	hsa04660:T cell receptor signaling pathway	4.16326	3.49276e-12	13	IL10, GSK3B, JUN, MAPK14, IL2, RELA, IL4, NFKBIA, CD40LG, IFNG, CDK4, AKT1, MAPK1	17.5347	5.58842e-10	7.98344e-11	3.79214e-11
KEGG_PATHWAY	hsa05145:Toxoplasmosis	4.16326	1.11062e-11	13	IL10, NOS2, XIAP, MAPK14, RELA, CASP9, NFKBIA, CD40LG, IFNG, CASP3, AKT1, MAPK1, BCL2L1	15.9406	1.777e-09	2.12369e-10	1.00875e-10
KEGG_PATHWAY	hsa05212:Pancreatic cancer	10.3495	2.1126e-11	11	RB1, CASP9, CCND1, CDK4, ERBB2, MAPK1, AKT1, TP53, RELA, EGFR, BCL2L1	22.8262	3.38016e-09	3.38015e-10	1.60557e-10
KEGG_PATHWAY	hsa05220:Chronic myeloid leukemia	10.3495	6.09602e-11	11	RB1, NFKBIA, CDKN1A, CCND1, CDK4, MDM2, MAPK1, AKT1, TP53, RELA, BCL2L1	20.607	9.75364e-09	8.86694e-10	4.21179e-10
KEGG_PATHWAY	hsa05220:Chronic myeloid leukemia	9.40934	6.09602e-11	11	RB1, NFKBIA, CDKN1A, CCND1, CDK4, MDM2, MAPK1, AKT1, TP53, RELA, BCL2L1	20.607	9.75364e-09	8.86694e-10	4.21179e-10
KEGG_PATHWAY	hsa05205:Proteoglycans in cancer	10.3495	7.31439e-11	15	CDKN1A, MMP2, MAPK14, ESR1, MMP9, EGFR, CCND1, PLAU, CASP3, ERBB2, MDM2, AKT1, MAPK1, MET, TP53	10.1162	1.1703e-08	9.75252e-10	4.63244e-10
KEGG_PATHWAY	hsa05223:Non-small cell lung cancer	10.3495	1.55777e-10	10	RB1, CASP9, RXRA, CCND1, CDK4, ERBB2, MAPK1, AKT1, TP53, EGFR	24.0861	2.49243e-08	1.91726e-09	9.10697e-10
KEGG_PATHWAY	hsa04668:TNF signaling pathway	4.16326	1.7248e-10	12	NFKBIA, IL6, CASP7, JUN, CASP3, MAPK1, AKT1, MAPK14, PTGS2, MMP9, RELA, ICAM1	15.127	2.75968e-08	1.9712e-09	9.3632e-10
KEGG_PATHWAY	hsa05169:Epstein-Barr virus infection	9.40934	7.21764e-10	12	RB1, NFKBIA, CCNA2, CDKN1A, JUN, CDK2, MDM2, AKT1, MAPK14, TP53, RELA, ICAM1	13.2671	1.15482e-07	7.69882e-09	3.65694e-09
KEGG_PATHWAY	hsa04115:p53 signaling pathway	9.00612	8.28417e-10	10	CASP9, CDKN1A, CCNB1, CCND1, CDK4, CASP3, CHEK1, CDK2, MDM2, TP53	20.1317	1.32547e-07	8.10055e-09	3.84776e-09
KEGG_PATHWAY	hsa04110:Cell cycle	9.00612	8.60683e-10	12	RB1, CCNA2, GSK3B, CDKN1A, CCNB1, PCNA, CCND1, CDK4, CHEK1, CDK2, MDM2, TP53	13.0531	1.37709e-07	8.10055e-09	3.84776e-09
KEGG_PATHWAY	hsa05203:Viral carcinogenesis	9.40934	1.34442e-09	4	RB1, CDKN1A, JUN, RELA, NFKBIA, CCNA2, CCND1, CDK4, CASP3, CHEK1, CDK2, MDM2, MAPK1, TP53	9.21148	2.15108e-07	1.12961e-08	5.36567e-09
KEGG_PATHWAY	hsa05203:Viral carcinogenesis	9.00612	1.34442e-09	14	RB1, CDKN1A, JUN, RELA, NFKBIA, CCNA2, CCND1, CDK4, CASP3, CHEK1, CDK2, MDM2, MAPK1, TP53	9.21148	2.15108e-07	1.12961e-08	5.36567e-09
KEGG_PATHWAY	hsa05218:Melanoma	10.3495	1.41202e-09	10	RB1, CDKN1A, CCND1, CDK4, MDM2, MAPK1, AKT1, TP53, MET, EGFR	18.9975	2.25923e-07	1.12961e-08	5.36567e-09
KEGG_PATHWAY	hsa05140:Leishmaniasis	4.16326	1.41202e-09	10	IL10, NFKBIA, IL4, JUN, IFNG, NOS2, MAPK1, MAPK14, PTGS2, RELA	18.9975	2.25923e-07	1.12961e-08	5.36567e-09
KEGG_PATHWAY	hsa05142:Chagas disease (American trypanosomiasis)	4.16326	2.5009e-09	11	IL10, NFKBIA, IL6, JUN, IFNG, NOS2, MAPK1, AKT1, MAPK14, RELA, IL2	14.2664	4.00144e-07	1.73976e-08	8.26385e-09
KEGG_PATHWAY	hsa05214:Glioma	10.3495	1.60297e-08	9	RB1, CDKN1A, CCND1, CDK4, MDM2, MAPK1, AKT1, TP53, EGFR	18.676	2.56475e-06	9.86444e-08	4.68561e-08
KEGG_PATHWAY	hsa05133:Pertussis	4.16326	5.07285e-08	9	IL10, IL6, CASP7, JUN, NOS2, CASP3, MAPK1, MAPK14, RELA	16.1859	8.11653e-06	2.89877e-07	1.37692e-07
KEGG_PATHWAY	hsa05213:Endometrial cancer	10.3495	7.23756e-08	8	CASP9, GSK3B, CCND1, ERBB2, MAPK1, AKT1, TP53, EGFR	20.7511	1.158e-05	3.99314e-07	1.89674e-07
KEGG_PATHWAY	hsa05164:Influenza A	4.16326	3.5447e-07	11	NFKBIA, CASP9, GSK3B, IL6, JUN, IFNG, MAPK1, AKT1, MAPK14, RELA, ICAM1	8.52705	5.67136e-05	1.77235e-06	8.41867e-07
KEGG_PATHWAY	hsa05160:Hepatitis C	4.16326	3.68612e-07	10	NFKBIA, GSK3B, CDKN1A, RXRA, MAPK1, AKT1, MAPK14, TP53, RELA, EGFR	10.1415	5.89762e-05	1.78721e-06	8.48925e-07
KEGG_PATHWAY	hsa05152:Tuberculosis	4.16326	4.07383e-06	10	IL10, CASP9, IL6, IFNG, NOS2, CASP3, MAPK1, AKT1, MAPK14, RELA	7.62047	0.000651602	1.86232e-05	8.84603e-06
KEGG_PATHWAY	hsa05321:Inflammatory bowel disease (IBD)	4.16326	5.89585e-06	7	IL10, IL4, IL6, JUN, IFNG, RELA, IL2	14.7528	0.000942894	2.54956e-05	1.21104e-05
KEGG_PATHWAY	hsa05321:Inflammatory bowel disease (IBD)	2.88144	5.89585e-06	7	IL10, IL4, IL6, JUN, IFNG, RELA, IL2	14.7528	0.000942894	2.54956e-05	1.21104e-05
KEGG_PATHWAY	hsa04915:Estrogen signaling pathway	3.23311	6.21786e-06	8	HSP90AA1, JUN, MMP2, MAPK1, AKT1, ESR1, MMP9, EGFR	10.8996	0.000994366	2.61805e-05	1.24357e-05
KEGG_PATHWAY	hsa05120:Epithelial cell signaling in Helicobacter pylori infection	4.16326	7.71922e-06	7	NFKBIA, JUN, CASP3, MAPK14, MET, RELA, EGFR	14.0922	0.00123432	3.16686e-05	1.50426e-05
KEGG_PATHWAY	hsa04917:Prolactin signaling pathway	4.16326	1.08368e-05	7	GSK3B, CCND1, MAPK1, AKT1, MAPK14, ESR1, RELA	13.2983	0.00173239	4.29453e-05	2.0399e-05
KEGG_PATHWAY	hsa04722:Neurotrophin signaling pathway	4.16326	2.21311e-05	8	NFKBIA, GSK3B, JUN, MAPK1, AKT1, MAPK14, TP53, RELA	8.99216	0.00353476	8.43091e-05	4.00468e-05
KEGG_PATHWAY	hsa05144:Malaria	2.88144	2.47823e-05	6	IL10, IL6, CD40LG, IFNG, MET, ICAM1	16.5162	0.00395736	9.22131e-05	4.38012e-05
KEGG_PATHWAY	hsa05132:Salmonella infection	4.16326	2.67341e-05	7	IL6, JUN, IFNG, NOS2, MAPK1, MAPK14, RELA	11.3756	0.00426838	9.7215e-05	4.61771e-05
KEGG_PATHWAY	hsa04914:Progesterone-mediated oocyte maturation	4.16326	3.49882e-05	7	CCNA2, HSP90AA1, CCNB1, CDK2, MAPK1, AKT1, MAPK14	10.8526	0.00558258	0.000121698	5.78067e-05
KEGG_PATHWAY	hsa04012:ErbB signaling pathway	3.23311	3.49882e-05	7	GSK3B, CDKN1A, JUN, ERBB2, MAPK1, AKT1, EGFR	10.8526	0.00558258	0.000121698	5.78067e-05
KEGG_PATHWAY	hsa04380:Osteoclast differentiation	4.16326	3.90759e-05	8	NFKBIA, JUN, IFNG, MAPK1, AKT1, PPARG, MAPK14, RELA	8.23709	0.00623276	0.000133024	6.31866e-05
KEGG_PATHWAY	hsa05134:Legionellosis	2.9997	3.99936e-05	6	NFKBIA, CASP9, IL6, CASP7, CASP3, RELA	14.9869	0.00637868	0.000133312	6.33233e-05
KEGG_PATHWAY	hsa04621:NOD-like receptor signaling pathway	4.16326	4.77814e-05	6	NFKBIA, IL6, HSP90AA1, MAPK1, MAPK14, RELA	14.4517	0.00761606	0.000156021	7.411e-05
KEGG_PATHWAY	hsa04630:Jak-STAT signaling pathway	2.88144	7.48165e-05	8	IL10, IL4, IL6, IFNG, CCND1, AKT1, IL2, BCL2L1	7.44178	0.0118997	0.000234718	0.000111491
KEGG_PATHWAY	hsa05230:Central carbon metabolism in cancer	10.3495	9.12985e-05	6	ERBB2, MAPK1, AKT1, TP53, MET, EGFR	12.6452	0.0145022	0.000280918	0.000133436
KEGG_PATHWAY	hsa05230:Central carbon metabolism in cancer	3.23311	9.12985e-05	6	ERBB2, MAPK1, AKT1, TP53, MET, EGFR	12.6452	0.0145022	0.000280918	0.000133436
KEGG_PATHWAY	hsa05230:Central carbon metabolism in cancer	2.07083	9.12985e-05	6	ERBB2, MAPK1, AKT1, TP53, MET, EGFR	12.6452	0.0145022	0.000280918	0.000133436
KEGG_PATHWAY	hsa04510:Focal adhesion	3.23311	0.000102676	9	GSK3B, JUN, CCND1, ERBB2, MAPK1, XIAP, AKT1, MET, EGFR	5.89292	0.0162948	0.000309966	0.000147234
KEGG_PATHWAY	hsa04620:Toll-like receptor signaling pathway	4.16326	0.000106458	7	NFKBIA, IL6, JUN, MAPK1, AKT1, MAPK14, RELA	8.90733	0.01689	0.000315432	0.00014983
KEGG_PATHWAY	hsa04662:B cell receptor signaling pathway	4.16326	0.000130952	6	NFKBIA, GSK3B, JUN, MAPK1, AKT1, RELA	11.7289	0.0207356	0.00038095	0.000180951
KEGG_PATHWAY	hsa04662:B cell receptor signaling pathway	3.23311	0.000130952	6	NFKBIA, GSK3B, JUN, MAPK1, AKT1, RELA	11.7289	0.0207356	0.00038095	0.000180951
KEGG_PATHWAY	hsa05330:Allograft rejection	2.88144	0.000136721	5	IL10, IL4, CD40LG, IFNG, IL2	18.2273	0.0216393	0.000390631	0.00018555
KEGG_PATHWAY	hsa05168:Herpes simplex infection	2.9997	0.000319106	8	NFKBIA, IL6, JUN, IFNG, CASP3, CDK2, TP53, RELA	5.8965	0.0497832	0.000895737	0.000425475
KEGG_PATHWAY	hsa04672:Intestinal immune network for IgA production	2.88144	0.000350019	5	IL10, IL4, IL6, CD40LG, IL2	14.3492	0.0544731	0.000965571	0.000458646
KEGG_PATHWAY	hsa04370:VEGF signaling pathway	4.16326	0.000950346	5	CASP9, MAPK1, AKT1, MAPK14, PTGS2	11.0559	0.141121	0.0024907	0.00118308
KEGG_PATHWAY	hsa05146:Amoebiasis	4.16326	0.000965146	6	IL10, IL6, IFNG, NOS2, CASP3, RELA	7.63485	0.143155	0.0024907	0.00118308
KEGG_PATHWAY	hsa04931:Insulin resistance	4.16326	0.00105011	6	NFKBIA, GSK3B, IL6, INSR, AKT1, RELA	7.49346	0.154735	0.00266694	0.0012668
KEGG_PATHWAY	hsa04520:Adherens junction	2.07083	0.00167761	5	INSR, ERBB2, MAPK1, MET, EGFR	9.49876	0.235584	0.00416259	0.00197723
KEGG_PATHWAY	hsa05143:African trypanosomiasis	2.88144	0.00169105	4	IL10, IL6, IFNG, ICAM1	16.3494	0.237229	0.00416259	0.00197723
KEGG_PATHWAY	hsa04010:MAPK signaling pathway	4.16326	0.00216167	8	JUN, CASP3, MAPK1, AKT1, MAPK14, TP53, RELA, EGFR	4.26505	0.292658	0.00524041	0.00248919
KEGG_PATHWAY	hsa04010:MAPK signaling pathway	3.23311	0.00216167	8	JUN, CASP3, MAPK1, AKT1, MAPK14, TP53, RELA, EGFR	4.26505	0.292658	0.00524041	0.00248919
KEGG_PATHWAY	hsa04912:GnRH signaling pathway	3.23311	0.00414892	5	JUN, MMP2, MAPK1, MAPK14, EGFR	7.41112	0.485834	0.00976217	0.00463703
KEGG_PATHWAY	hsa04921:Oxytocin signaling pathway	3.23311	0.0044353	6	CDKN1A, JUN, CCND1, MAPK1, PTGS2, EGFR	5.39529	0.508959	0.0102848	0.00488526
KEGG_PATHWAY	hsa04014:Ras signaling pathway	2.07083	0.00558273	7	INSR, MAPK1, AKT1, MET, RELA, EGFR, BCL2L1	4.17777	0.591695	0.0127605	0.00606125
KEGG_PATHWAY	hsa05320:Autoimmune thyroid disease	2.88144	0.00621813	4	IL10, IL4, CD40LG, IL2	10.3756	0.631386	0.0140127	0.00665602
KEGG_PATHWAY	hsa05221:Acute myeloid leukemia	4.16326	0.0076426	4	CCND1, MAPK1, AKT1, RELA	9.63445	0.70698	0.0169836	0.00806719
KEGG_PATHWAY	hsa04071:Sphingolipid signaling pathway	4.16326	0.010935	5	MAPK1, AKT1, MAPK14, TP53, RELA	5.6201	0.827823	0.0238499	0.0113287
KEGG_PATHWAY	hsa05131:Shigellosis	4.16326	0.0110306	4	NFKBIA, MAPK1, MAPK14, RELA	8.43015	0.830465	0.0238499	0.0113287
KEGG_PATHWAY	hsa05211:Renal cell carcinoma	3.23311	0.0119929	4	JUN, MAPK1, AKT1, MET	8.17469	0.85492	0.0252483	0.0119929
KEGG_PATHWAY	hsa04664:Fc epsilon RI signaling pathway	4.16326	0.0130023	4	IL4, MAPK1, AKT1, MAPK14	7.93426	0.876809	0.0270179	0.0130023
KEGG_PATHWAY	hsa04920:Adipocytokine signaling pathway	4.16326	0.0140591	4	NFKBIA, RXRA, AKT1, RELA	7.70756	0.896214	0.0288392	0.0140591
KEGG_PATHWAY	hsa04015:Rap1 signaling pathway	2.07083	0.0175721	6	INSR, MAPK1, AKT1, MAPK14, MET, EGFR	3.85378	0.941372	0.0355892	0.0175721
KEGG_PATHWAY	hsa05310:Asthma	2.88144	0.0197844	3	IL10, IL4, CD40LG	13.4882	0.959125	0.0395687	0.0197844
KEGG_PATHWAY	hsa05332:Graft-versus-host disease	2.88144	0.0236852	3	IL6, IFNG, IL2	12.262	0.978404	0.0467855	0.0236852
KEGG_PATHWAY	hsa04060:Cytokine-cytokine receptor interaction	2.88144	0.0307108	6	IL10, IL4, IL6, CD40LG, IFNG, IL2	3.33043	0.9932	0.0599235	0.0307108
KEGG_PATHWAY	hsa05231:Choline metabolism in cancer	3.23311	0.0366176	4	JUN, MAPK1, AKT1, EGFR	5.34188	0.997443	0.0697478	0.0366176
KEGG_PATHWAY	hsa04062:Chemokine signaling pathway	4.16326	0.0454126	5	NFKBIA, GSK3B, MAPK1, AKT1, RELA	3.62587	0.99941	0.0854825	0.0454126
